# Supplementary material for: Electron-compensation: a valid strategy for chemically stabilizing boron-based clusters with hypercoordinate centres
Source: Royal Society of Chemistry journal article supplement (doi:10.1039/d2cc05654b), 2022-01-01
Supplement: d2cc05654b1.pdf [file d2cc05654b1.pdf]

Electronic Supplementary Information

**Electron-compensation: A valid strategy for chemically stabilizing boron-based clusters with hypercoordinate centre**

Bo Jin,<sup>a</sup> Caixia Yuan,<sup>a</sup> Gang Lu<sup>b</sup> and Yan-Bo Wu<sup>\*a</sup>

a. Key Laboratory of Materials for Energy Conversion and Storage of Shanxi Province, Key Laboratory of Chemical Biology and Molecular Engineering of Ministry of Education, Institute of Molecular Science, Shanxi University, Taiyuan, Shanxi 030006, People's Republic of China.

b. School of Chemistry and Chemical Engineering, Shandong University, Jinan, 250100, People's Republic of China.

\*To whom correspondence should be addressed.

E-mail: [wyb@sxu.edu.cn](mailto:wyb@sxu.edu.cn) (Y.-B. W.)

## Contents

### **S11:** Computational Methods

**S12:** The structures of  $\text{CB}_4\text{X}_4$  ( $\text{X} = \text{O}, \text{S}, \text{Se}, \text{Te}, \text{Po}$ ), Wiberg bond orders of **1a**, NBO charges (in  $|e|$ ) of **1a**, full AdNDP bonding patterns of **1a**, the shapes of deformation densities ( $\Delta\rho$ ) for EDA-NOCV analysis of **1a**, concerned isomers of **1a**, and BOMD simulations of **1a**.

- Fig. S1.** Structures of  $\text{CB}_4\text{X}_4$  ( $\text{X} = \text{O}, \text{S}, \text{Se}, \text{Te}, \text{Po}$ )
- Fig. S2.** The Wiberg bond orders, and NBO charges (in  $|e|$ ) of **1a**
- Fig. S3.** Full sets of AdNDP bonding pattern for clusters **1a**.
- Fig. S4.** The shapes of deformation densities ( $\Delta\rho$ ) for EDA-NOCV analysis of  $\text{CB}_8\text{O}_8$ .
- Fig. S5.** Structures and relative energies ( $\Delta E$ , in  $\text{kcal mol}^{-1}$  at the CCSD(T)//PBE0 level) of **1a** and its isomers constructed by exchanging the positions of carbon and boron in **1a**.
- Fig. S6.** Root-mean-square deviation (RMSD, in Å) for **1a** in BOMD simulations at 4, 298, 500, and 1000 K.

**S13:** Cartesian coordinates of optimized structures shown in Fig. S1 and Fig. 2 at the PBE0/BS1 level.

## Computational Methods

In the calculations for validating the strategy, geometry optimization and harmonic vibrational frequency analysis of all clusters were performed at the PBE0/BS1 level, where BS1 denotes a mixed basis set with cc-pVTZ for C, B, O, and S and cc-pVTZ-PP for Se, Te, and Po. Adaptive natural density partitioning (AdNDP)<sup>1</sup> analyses were performed at the PBE0/6-31G(d) levels. The thermodynamic stability was studied by the exploration of potential energy surfaces of **1a** using basin hopping algorithm.<sup>2</sup> The isomers were initially optimized at the PBE/DZVP level and then the 20 low-energy isomers were re-optimized at the PBE0/BS1 level. The single point energies of the five lowest isomers were calculated at the CCSD(T)/BS1 level considering the Gibbs free energy corrections obtained at the PBE0/BS1 level, which was reported in the text. The dynamic stability of **1a** was studied using 100 picoseconds Born-Oppenheimer molecular dynamic (BOMD) simulations at the PBE/DZVP level and concerned temperatures using the CP2K<sup>3</sup> package. Nucleus-independent chemical shift (NICS)<sup>4</sup> was calculated to assess the aromaticity of **1a**. The basin hopping algorithm was realized using the Tsinghua Global Minimum (TGmin) 2.0 program,<sup>5</sup> the CCSD(T) calculations were carried out using the MolPro 2012.1 package,<sup>6</sup> the CS-NICS and composition of each orbital in AdNDP were generated with the Multiwfn 3.7 code,<sup>7</sup> the EDA-NOCV<sup>8,9</sup> were performed at the PBE0/TZ2P<sup>10</sup> level using the ADF 2022 program package,<sup>11</sup> and all other calculations were performed using the Gaussian 16 package.<sup>12</sup>

### References

- 1 D. Y. Zubarev and A. I. Boldyrev, *Phys. Chem. Chem. Phys.*, 2008, **10**, 5207-5217.
- 2 D. J. Wales and H. A. Scheraga, *Science*, 1999, **285**, 1368-1372.
- 3 T. D. Kühne and J. Hutter, *J. Chem. Phys.*, 2020, **152**, 194103.
- 4 P. v. R. Schleyer, C. Maerker, A. Dransfeld, H. Jiao and N. J. R. v. E. Hommes, *J. Am. Chem. Soc.*, 1996, **118**, 6317-6318.
- 5 X. Chen, Y.-F. Zhao, Y.-Y. Zhang and J. Li. *J. Comput. Chem.*, 2018, **9999**, 1–8.
- 6 H.-J. Werner, *et al.*, in *MolPro 2012.1*, University College Cardiff Consultants Limited, Cardiff U.K., 2012.
- 7 T. Lu and F. Chen, *J. Comput. Chem.*, 2012, **33**, 580-592.
- 8 A. Michalak, M. Mitoraj and T. Ziegler, *J. Phys. Chem. A*, 2008, **112**, 1933–1939.
- 9 M. P. Mitoraj, A. Michalak and T. Ziegler, *J. Chem. Theory Comput.*, 2009, **5**, 962–975.
- 10 E. Van Lenthe and E. J. Baerends, *J. Comput. Chem.*, 2003, **24**, 1142–1156.
- 11 G. te Velde, *et al.* *J. Comput. Chem.*, 2001, **22**, 931–967.
- 12 M. J. Frisch, *et al.*, in *Gaussian 16 Revision A.03*, Gaussian, Inc., Wallingford, CT, 2016.

**S12:** The structures of  $\text{CB}_4\text{X}_4$  ( $\text{X} = \text{O}, \text{S}, \text{Se}, \text{Te}, \text{Po}$ ), Wiberg bond orders of **1a**, NBO charges (in  $|e|$ ) of **1a**, full AdNDP bonding patterns of **1a**, the shapes of deformation densities ( $\Delta\rho$ ) for EDA-NOCV analysis of **1a**, concerned isomers of **1a**, and BOMD simulations of **1a**.

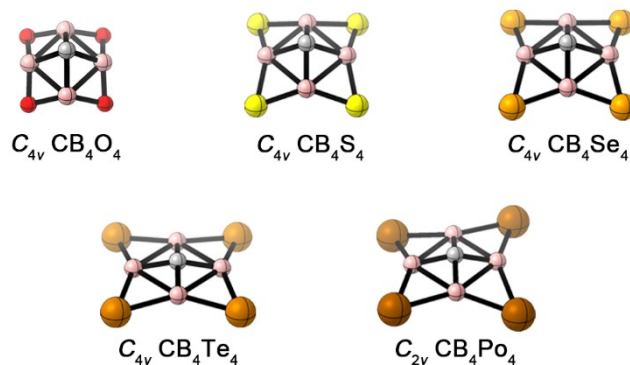

**Fig. S1** PBE0/BS1-optimized structures of  $\text{CB}_4\text{X}_4$  ( $\text{X} = \text{O}, \text{S}, \text{Se}, \text{Te}, \text{Po}$ ), all of which are not planar.

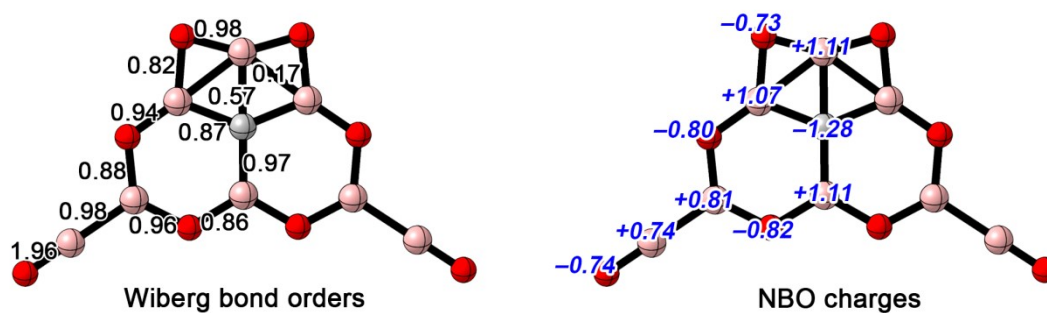

**Fig. S2** The Wiberg bond orders and NBO charges (in  $|e|$ ) of **1a**.

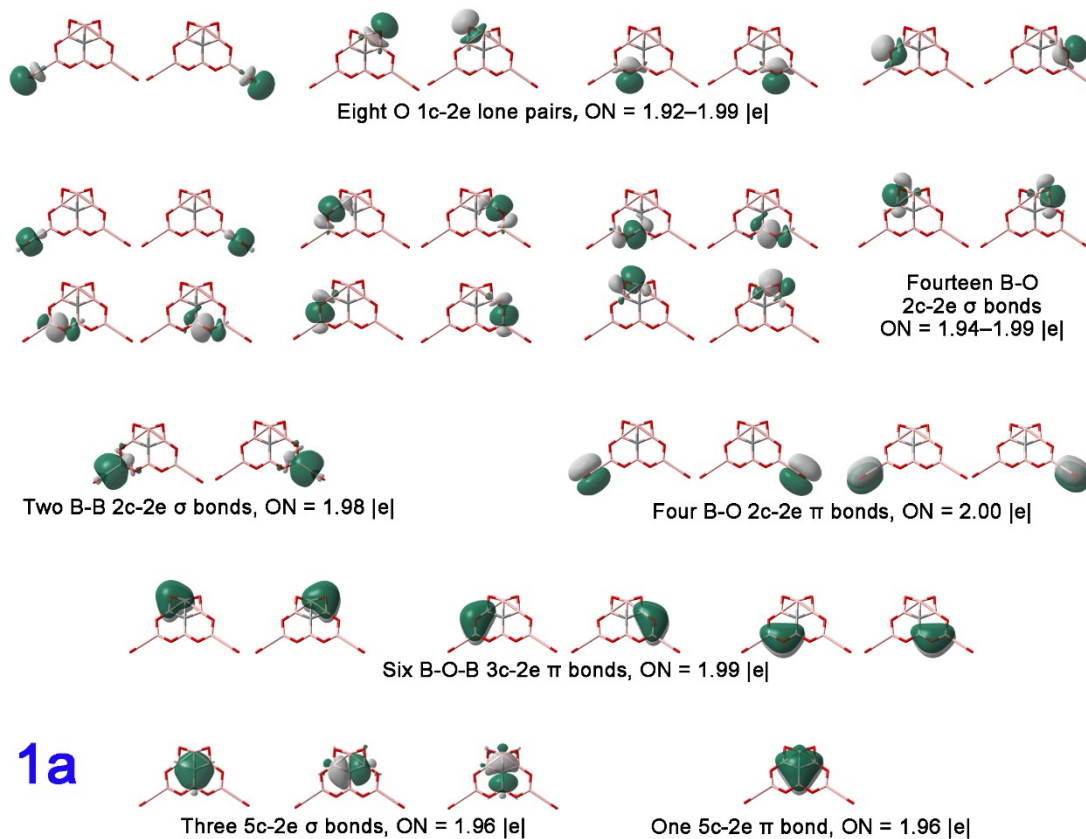

Fig. S3 Full sets of AdNDP bonding patterns for clusters **1a**.

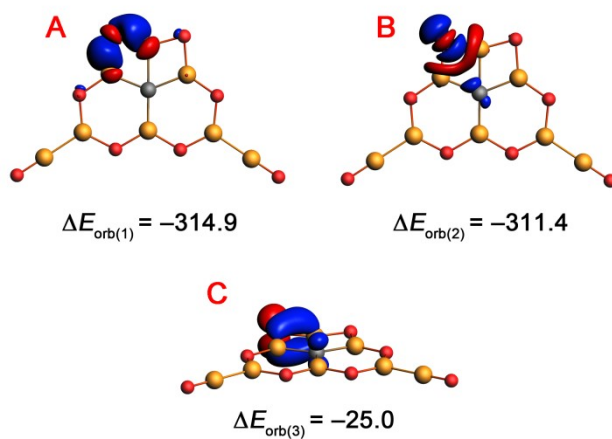

Fig. S4 The shapes of deformation densities ( $\Delta\rho$ ) for EDA-NOCV analysis of  $\text{CB}_8\text{O}_8$ . The corresponding orbital value is given in  $\text{kcal mol}^{-1}$ . The isovalues of the surfaces are 0.01 for  $\Delta\rho_{\text{orb}(1)-(2)}$ , 0.003 for  $\Delta\rho_{\text{orb}(3)}$ . The direction of charge flow is from red to blue.

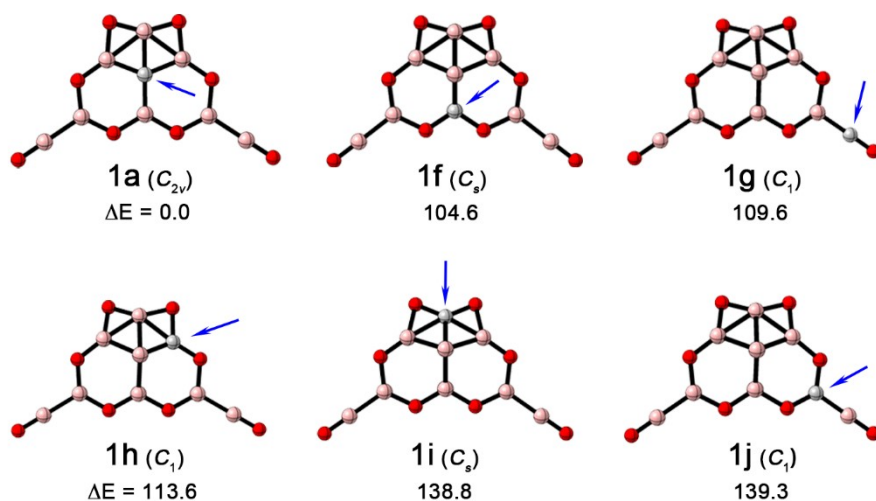

**Fig. S5** Structures and relative energies ( $\Delta E$ , in kcal mol<sup>-1</sup> at the CCSD(T)//PBE0 level) of **1a** and its isomers constructed by exchanging the positions of carbon and boron in **1a**.

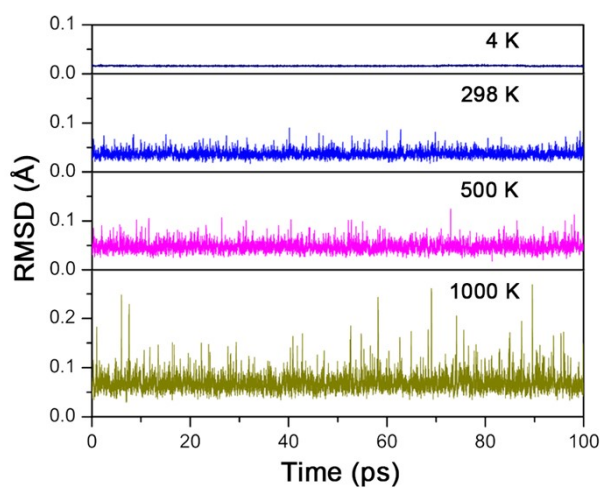

**Fig. S6** Root-mean-square deviation (RMSD, in Å) for **1a** in BOMD simulations at 4, 298, 500, and 1000 K. The simulations were performed at the PBE/DZVP level.

**SI3:** Cartesian coordinates of optimized structures shown in Fig. S1 and Fig. 2 at the PBE0/BS1 level.

CB<sub>4</sub>O<sub>4</sub>

|   |             |             |             |
|---|-------------|-------------|-------------|
| C | 0.00032300  | 0.00059600  | -1.16034600 |
| B | 0.96142900  | -0.79119200 | -0.20042600 |
| B | 0.79085800  | 0.96126400  | -0.20180000 |
| B | -0.79104000 | -0.96097100 | -0.20159300 |
| B | -0.96090900 | 0.79081800  | -0.20132900 |
| O | -0.17758800 | 1.82550300  | 0.34374100  |
| O | 1.82623400  | 0.17732000  | 0.34336900  |
| O | 0.17724700  | -1.82576700 | 0.34308300  |
| O | -1.82634700 | -0.17745300 | 0.34328400  |

CB<sub>4</sub>S<sub>4</sub>

|   |             |             |             |
|---|-------------|-------------|-------------|
| C | 0.00030800  | -0.00011400 | 1.04213600  |
| B | 0.80623600  | 1.11493700  | 0.32630900  |
| B | -1.11472600 | 0.80594700  | 0.32614100  |
| B | 1.11501400  | -0.80637300 | 0.32620600  |
| B | -0.80644500 | -1.11456200 | 0.32620600  |
| S | 0.38557700  | -2.40223300 | -0.19954300 |
| S | -2.40239000 | -0.38551000 | -0.19971700 |
| S | -0.38559500 | 2.40220200  | -0.19951300 |
| S | 2.40226800  | 0.38559900  | -0.19979700 |

CB<sub>4</sub>Se<sub>4</sub>

|    |             |             |             |
|----|-------------|-------------|-------------|
| C  | 0.00080100  | -0.00037900 | 1.00610000  |
| B  | -1.28852100 | 0.58008100  | 0.38653700  |
| B  | -0.58092600 | -1.28896200 | 0.38683400  |
| B  | 0.58029500  | 1.28916400  | 0.38654100  |
| B  | 1.29001100  | -0.58090700 | 0.38641500  |
| Se | 2.45227500  | 0.92933900  | -0.10089200 |
| Se | 0.92941600  | -2.45187800 | -0.10164200 |
| Se | -2.45244600 | -0.92924300 | -0.10085400 |
| Se | -0.92951200 | 2.45194000  | -0.10156100 |

CB<sub>4</sub>Te<sub>4</sub>

|    |             |             |             |
|----|-------------|-------------|-------------|
| B  | -1.06367400 | 1.06367400  | 0.22285200  |
| B  | 1.06367400  | 1.06367400  | 0.22285200  |
| B  | -1.06367400 | -1.06367400 | 0.22285200  |
| B  | 1.06367400  | -1.06367400 | 0.22285200  |
| C  | 0.00000000  | 0.00000000  | 0.51486500  |
| Te | 0.00000000  | 2.96924700  | -0.03628000 |
| Te | 2.96924700  | 0.00000000  | -0.03628000 |
| Te | 0.00000000  | -2.96924700 | -0.03628000 |
| Te | -2.96924700 | 0.00000000  | -0.03628000 |

CB<sub>4</sub>Po<sub>4</sub>

|    |             |             |             |
|----|-------------|-------------|-------------|
| B  | -1.03099300 | 1.06940600  | 0.29248600  |
| B  | 1.03099300  | 1.06940600  | 0.29248600  |
| B  | -1.03099300 | -1.06940600 | 0.29248600  |
| B  | 1.03099300  | -1.06940600 | 0.29248600  |
| C  | 0.00000000  | 0.00000000  | 0.66372900  |
| Po | 0.00000000  | 3.08980700  | 0.20216900  |
| Po | 2.96393300  | 0.00000000  | -0.26069300 |
| Po | 0.00000000  | -3.08980700 | 0.20216900  |
| Po | -2.96393300 | 0.00000000  | -0.26069300 |

CB<sub>6</sub>O<sub>6</sub>

|   |             |             |             |
|---|-------------|-------------|-------------|
| B | 0.34938200  | -1.21248300 | 0.32377100  |
| B | -1.64946500 | 0.00043800  | 0.00262800  |
| O | 1.39194800  | -2.04246700 | -0.18734800 |
| B | 2.07673500  | 0.86957900  | 0.04181500  |
| B | 0.34984000  | 1.21185300  | 0.32240400  |
| O | -0.98795700 | 1.21112800  | 0.03266200  |
| O | 1.39328800  | 2.04206300  | -0.18607800 |
| O | -0.98874200 | -1.21068200 | 0.03527100  |
| O | 3.00082400  | -0.00014700 | -0.53724100 |
| B | 2.07521400  | -0.86988400 | 0.03847800  |
| C | 1.06974000  | -0.00022100 | 0.90604700  |
| B | -3.33213600 | 0.00050300  | -0.12721300 |
| O | -4.53014700 | 0.00026700  | -0.21297900 |

**1a**

|   |             |             |             |
|---|-------------|-------------|-------------|
| B | 0.00000000  | 0.00000000  | 0.66267063  |
| B | 0.00000000  | -2.40568994 | 0.74391573  |
| O | 0.00000000  | 1.19351709  | 1.36363858  |
| O | 0.00000000  | 2.53725400  | -0.63443349 |
| B | -0.00000000 | 2.40568994  | 0.74391573  |
| B | 0.00000000  | 0.00000000  | -2.46754938 |
| B | 0.00000000  | -1.42570104 | -1.40645531 |
| O | 0.00000000  | -2.53725400 | -0.63443349 |
| O | 0.00000000  | -1.30614409 | -2.82386330 |
| O | 0.00000000  | -1.19351709 | 1.36363858  |
| O | -0.00000000 | 1.30614409  | -2.82386330 |
| B | -0.00000000 | 1.42570104  | -1.40645531 |
| C | 0.00000000  | 0.00000000  | -0.83719537 |
| B | 0.00000000  | 3.81290211  | 1.67712947  |
| B | 0.00000000  | -3.81290211 | 1.67712947  |
| O | 0.00000000  | 4.81554213  | 2.33851240  |
| O | 0.00000000  | -4.81554213 | 2.33851240  |

**1b**

|   |             |             |             |
|---|-------------|-------------|-------------|
| B | 0.89989010  | -1.23847142 | 0.04876399  |
| O | 2.26056832  | 1.20569006  | -0.00602244 |
| O | 0.00000000  | 2.30316493  | 0.00680591  |
| O | -2.26056832 | 1.20569006  | -0.00602244 |
| B | 0.89989010  | 1.23847142  | 0.04876399  |
| B | 2.92326675  | -0.00000000 | -0.01639385 |
| O | 2.26056832  | -1.20569006 | -0.00602244 |
| O | 0.00000000  | -2.30316493 | 0.00680591  |
| B | -0.89989010 | 1.23847142  | 0.04876399  |
| B | -2.92326675 | -0.00000000 | -0.01639385 |
| B | -0.89989010 | -1.23847142 | 0.04876399  |
| C | 0.00000000  | 0.00000000  | 0.14454002  |
| O | -2.26056832 | -1.20569006 | -0.00602244 |
| B | -4.61068697 | 0.00000000  | -0.04808888 |
| B | 4.61068697  | 0.00000000  | -0.04808888 |
| O | -5.81120509 | 0.00000000  | -0.06961681 |
| O | 5.81120509  | 0.00000000  | -0.06961681 |



**1c**

|   |             |             |             |
|---|-------------|-------------|-------------|
| B | 0.04804800  | -0.28904800 | -0.09418000 |
| B | 2.37216000  | -0.89665900 | 0.00746500  |
| O | -1.28237700 | -0.61809300 | -0.01606000 |
| O | -3.57234200 | -0.02157700 | 0.04039700  |
| B | -2.25552600 | 0.35280100  | 0.02687700  |
| B | 0.72710800  | 2.73538000  | 0.04621900  |
| B | 1.95182600  | 1.44070200  | -0.07275600 |
| O | 2.83405500  | 0.41293500  | 0.01442800  |
| O | 2.10743800  | 2.82565700  | 0.05848900  |
| O | 1.04686400  | -1.23981800 | -0.00674300 |
| O | -2.00235800 | 1.70434500  | 0.07600600  |
| B | -0.70397300 | 2.11044900  | -0.00693600 |
| C | 0.43961700  | 1.16418900  | -0.21953500 |
| B | -4.15680700 | -1.20530700 | 0.01202800  |
| B | 3.52678100  | -2.12971000 | 0.02978300  |
| O | -4.75410400 | -2.25626100 | -0.01310000 |
| O | 4.34960100  | -3.00446000 | 0.04342300  |

**1d**

|   |             |             |             |
|---|-------------|-------------|-------------|
| B | 0.34405300  | -0.73990600 | 0.00049800  |
| B | -1.96470700 | -1.39153900 | -0.00015400 |
| O | 1.67675400  | -1.18725800 | 0.00036100  |
| O | 2.53135900  | 1.02601700  | 0.00004000  |
| B | 2.75095300  | -0.37520200 | 0.00016600  |
| B | -1.49474200 | 3.36347000  | -0.00039900 |
| B | -1.55727200 | 0.97920300  | 0.00030500  |
| O | -2.40832000 | -0.09956800 | 0.00005100  |
| O | -2.16161400 | 2.22514800  | -0.00032400 |
| O | -0.63263500 | -1.70328700 | 0.00000000  |
| O | -0.86562500 | 4.39857400  | -0.00036500 |
| B | 1.23905500  | 1.23318300  | 0.00048300  |
| C | -0.06279800 | 0.75304500  | 0.00117100  |
| B | 4.33004600  | -0.94775100 | 0.00004400  |
| B | -3.09450600 | -2.64756300 | -0.00024000 |
| O | 5.45882000  | -1.35420300 | -0.00078800 |
| O | -3.89719100 | -3.54139200 | -0.00029300 |

**1e**

|   |             |             |             |
|---|-------------|-------------|-------------|
| B | 0.06021800  | -0.55468700 | 0.18051400  |
| B | 2.43535800  | -0.83743500 | -0.00738100 |
| O | -1.24951900 | -1.02604000 | 0.10589300  |
| O | -3.46732400 | -0.16481500 | -0.01790200 |
| B | -2.12271500 | 0.03987300  | 0.07274300  |
| B | 0.24098700  | 2.48988200  | -0.04038600 |
| B | 1.66428600  | 1.39256000  | 0.08303300  |
| O | 2.70061600  | 0.52301900  | -0.04279000 |
| O | 1.56485200  | 2.78898600  | -0.17751900 |
| O | 1.17040300  | -1.36129900 | 0.05260100  |
| O | -1.05510500 | 2.87969000  | -0.12894000 |
| B | -1.18030700 | 1.48149000  | 0.14457400  |
| C | 0.24166600  | 0.93000000  | 0.36473600  |
| B | -4.20214000 | -1.26543600 | -0.08299200 |
| B | 3.75037100  | -1.89559400 | -0.06258000 |
| O | -4.93662200 | -2.22282700 | -0.14572500 |
| O | 4.68766400  | -2.64587100 | -0.09887200 |

**1f**

|   |             |             |             |
|---|-------------|-------------|-------------|
| B | -2.35497900 | -0.69626800 | 0.00712400  |
| O | 1.10826500  | -1.28920100 | 0.08413300  |
| O | 2.53893500  | 0.66169900  | -0.01615900 |
| B | 2.35495400  | -0.69628400 | 0.00695100  |
| B | 0.00001200  | 2.47300700  | -0.04217800 |
| B | -1.46714600 | 1.48264400  | 0.18345300  |
| O | -2.53892800 | 0.66171300  | -0.01610900 |
| O | -1.29690300 | 2.83124700  | -0.22788000 |
| O | -1.10828400 | -1.28919400 | 0.08418900  |
| O | 1.29695000  | 2.83126700  | -0.22770300 |
| B | 1.46716500  | 1.48262400  | 0.18350200  |
| B | 3.68329700  | -1.72412400 | -0.09773300 |
| B | -3.68332600 | -1.72408600 | -0.09769900 |
| O | 4.63566900  | -2.45215400 | -0.17011800 |
| O | -4.63568500 | -2.45212500 | -0.17017300 |
| B | -0.00000100 | 0.85713000  | 0.60042800  |
| C | -0.00000400 | -0.54987300 | 0.25988600  |
